# Supplementary material for: Ag(i), Cu(ii), Co(iii) and Hg(ii) complexes and metal-assisted products derived from 4-methyl-piperidine-carbodithioate: syntheses, structures, thermal analyses, redox behaviour and fluorescence properties
Source: Royal Society of Chemistry journal article supplement (doi:10.1039/c6ra15186h), 2016-01-01
Supplement: c6ra15186h1.pdf [file c6ra15186h1.pdf]

# Ag(I), Cu(II), Co(III), Hg(II) complexes and metal assisted products derived from 4-methyl-piperidine-carbodithioate: Syntheses, structures, redox behaviour, thermal analyses and fluorescence properties

Paras Nath, M. K. Bharty, B. Maiti, A. Bharti, R. J. Butcher, J. L. Wikaira and N. K. Singh

## SUPPLEMENTARY FIGURES

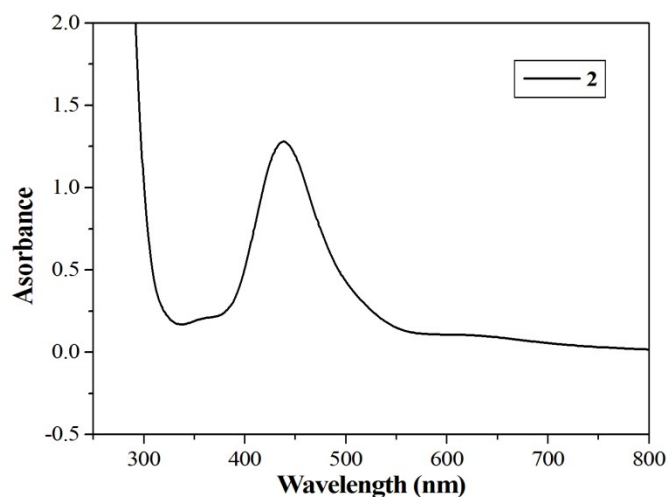

S.Fig. 1. Absorption spectrum of complex 2 at  $5 \times 10^{-4}$  M in methanol

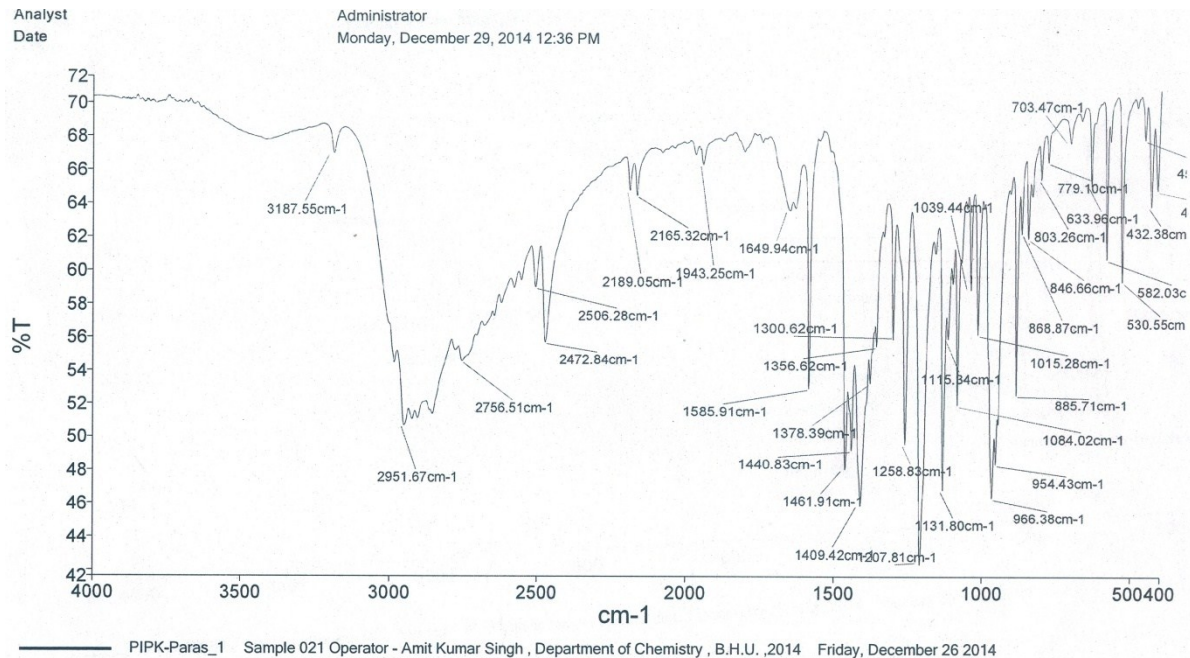

S.Fig. 2. IR spectrum of ligand {K<sup>+</sup>(4-mpipdct)<sup>-</sup>}

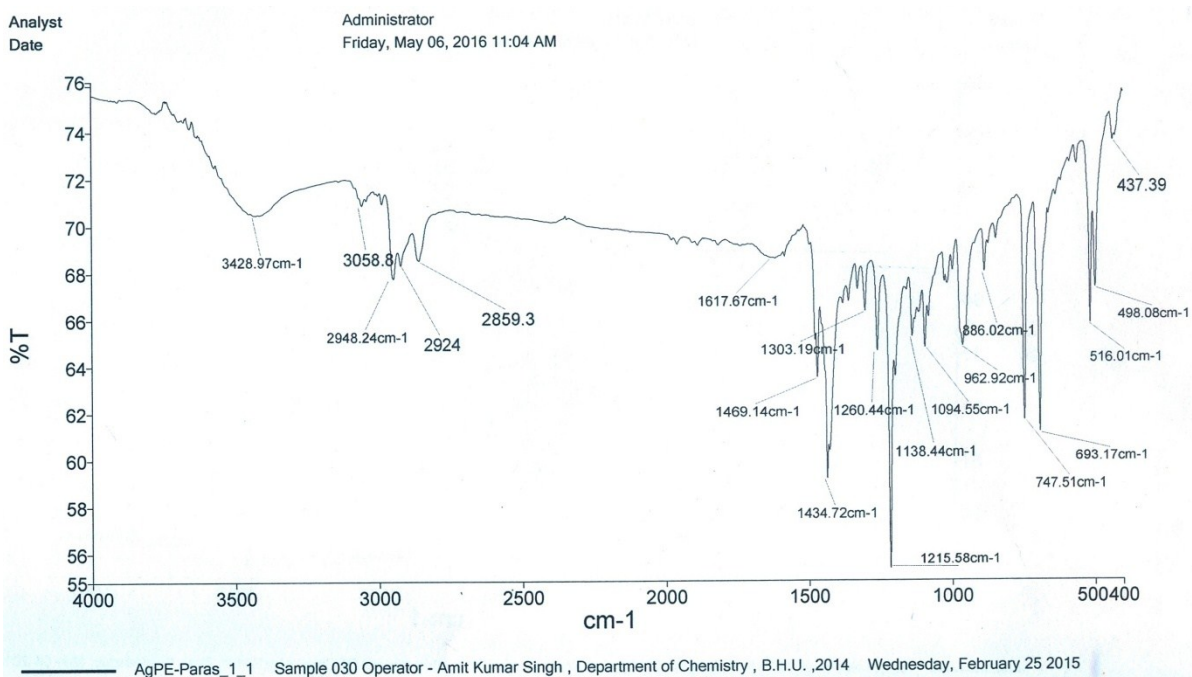

S.Fig. 3. IR spectrum of complex  $[Ag_2(4\text{-mpipdte})_2(PPh_3)_2]$  (1)

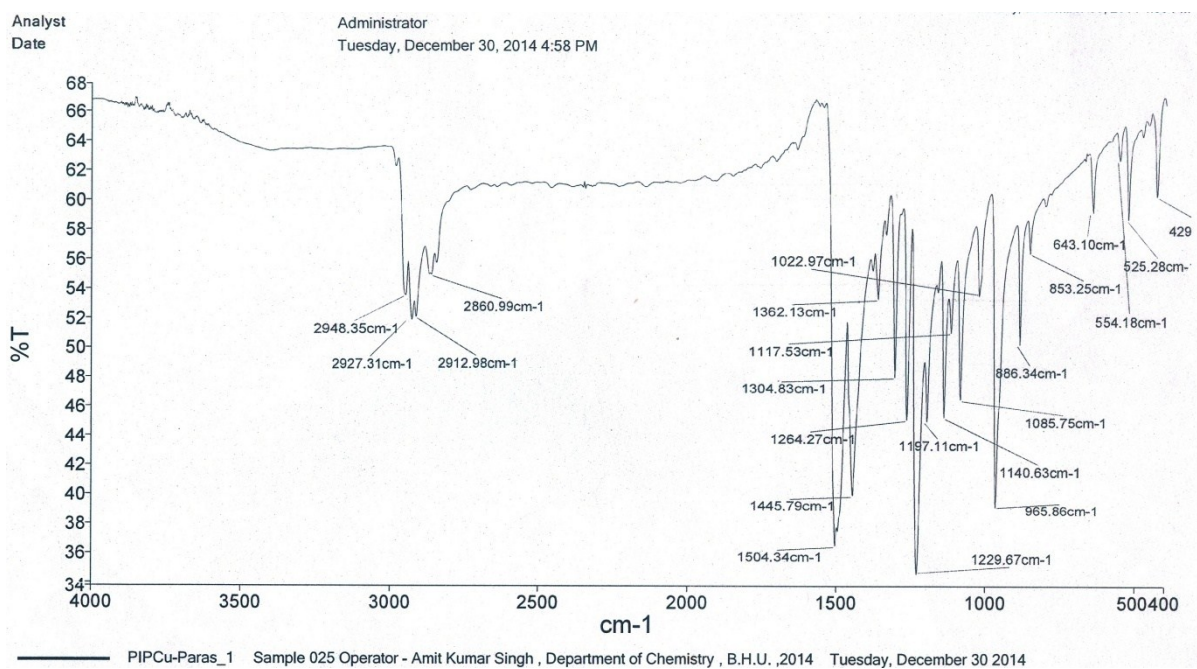

S.Fig. 4. IR spectrum of complex  $[Cu(4\text{-mpipdte})_2]$  (2)

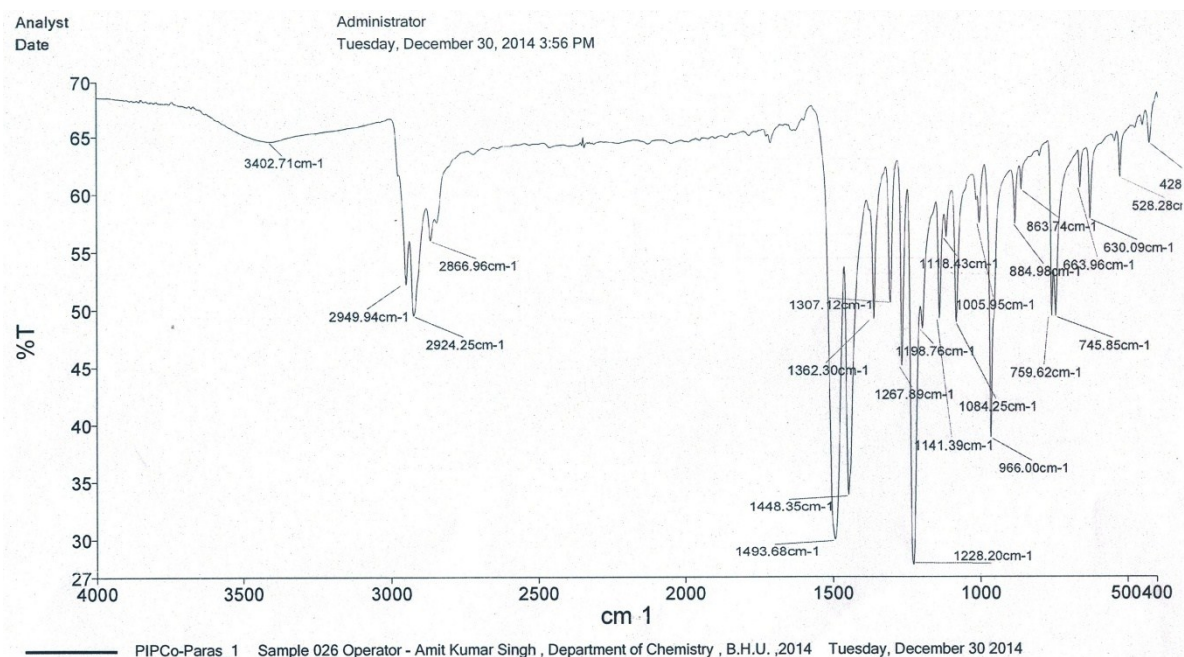

**S.Fig. 5.** IR spectrum of complex  $[\text{Co}(4\text{-mpipdct})_3]\cdot\text{CHCl}_3$  (3)

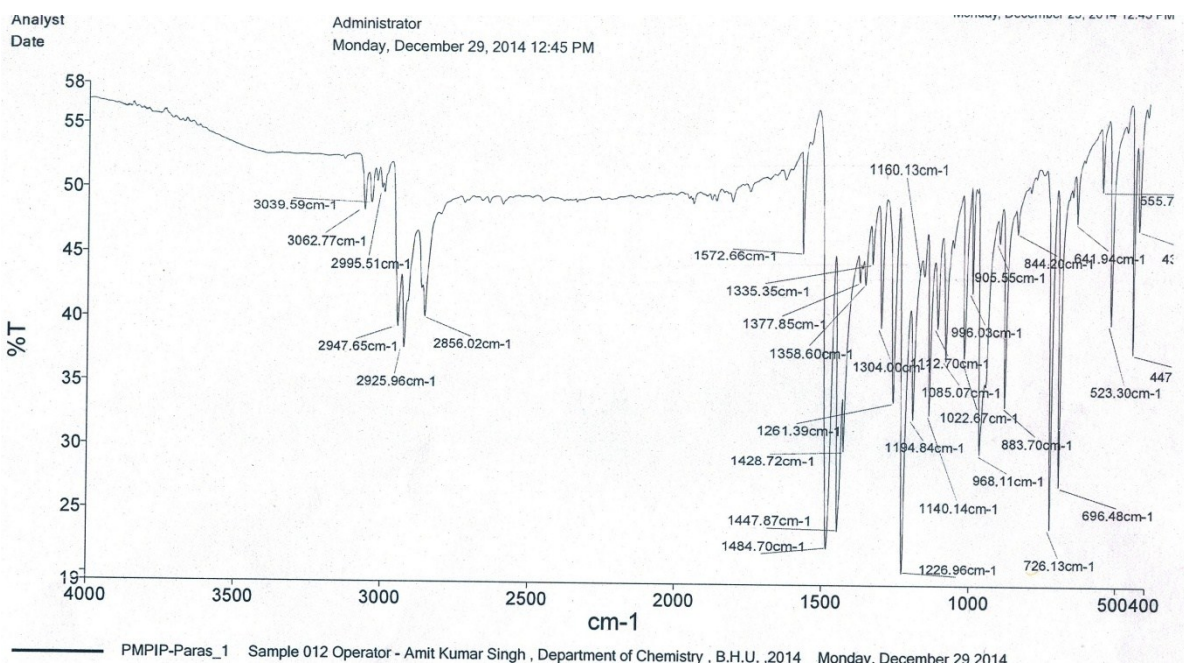

**S.Fig. 6.** IR spectrum of complex  $[\text{PhHg}(4\text{-mpipdct})]$  (4)

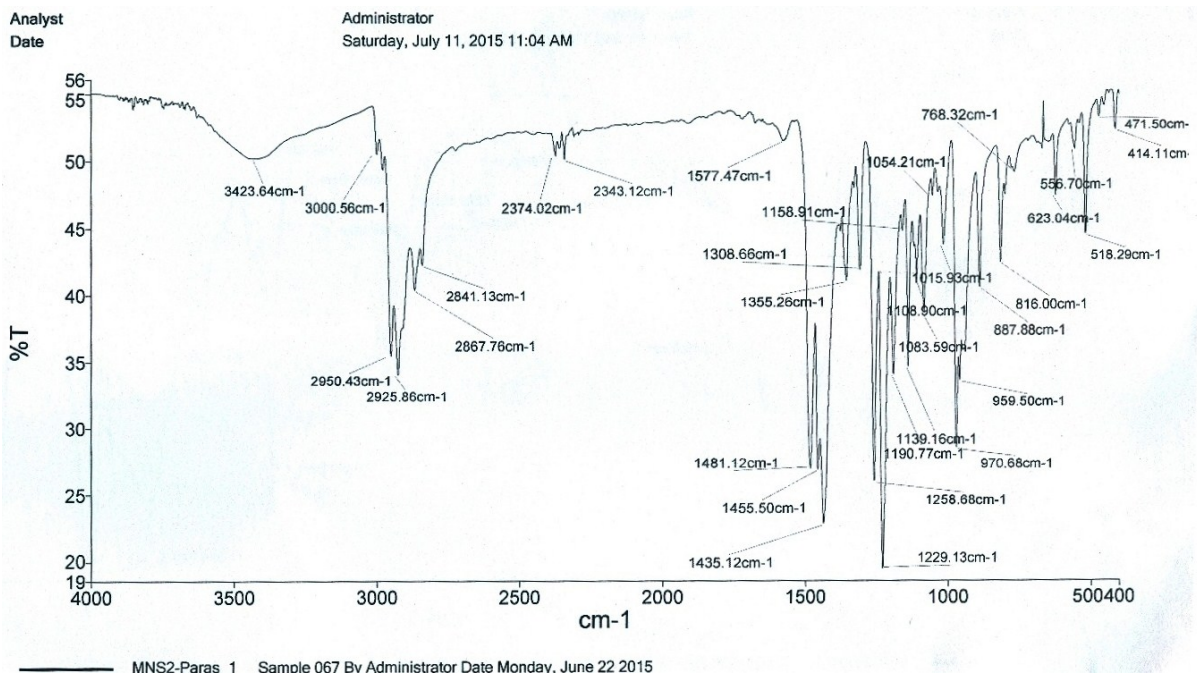

S.Fig. 7. IR spectrum of compound  $\{(4\text{-mpipdte})_2\}$  (5)

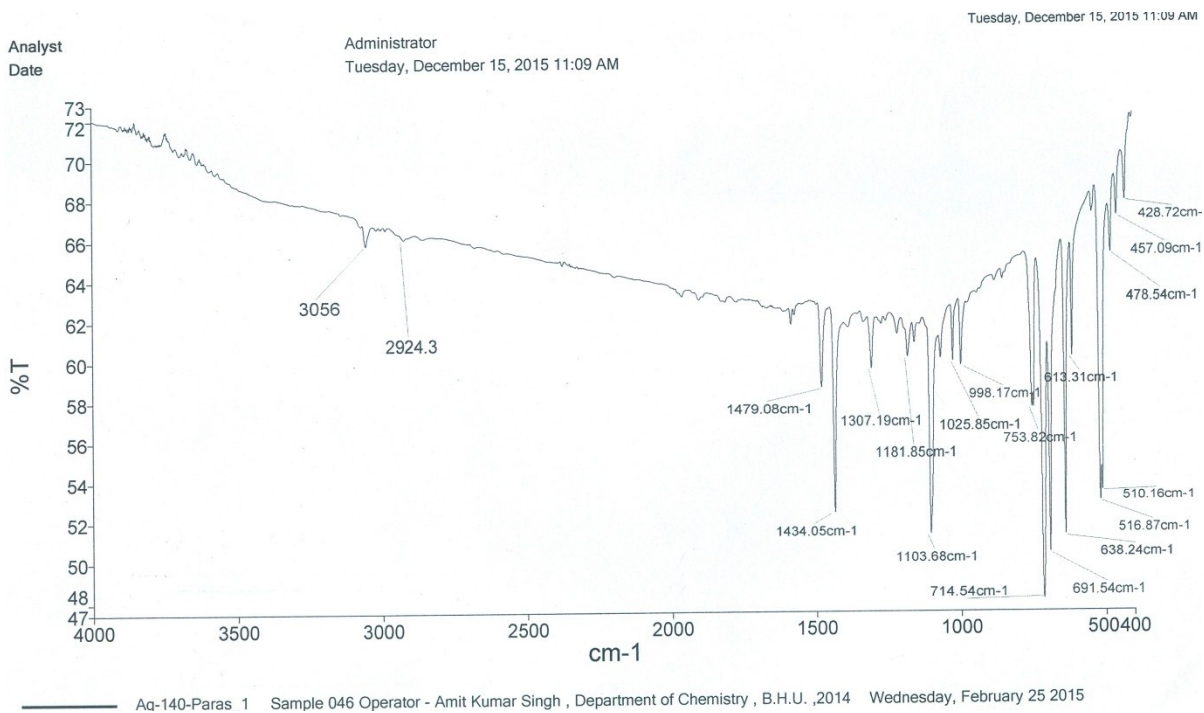

S.Fig. 8. IR spectrum of compound  $\text{CH}_2(4\text{-mpipdte})_2$  (6)

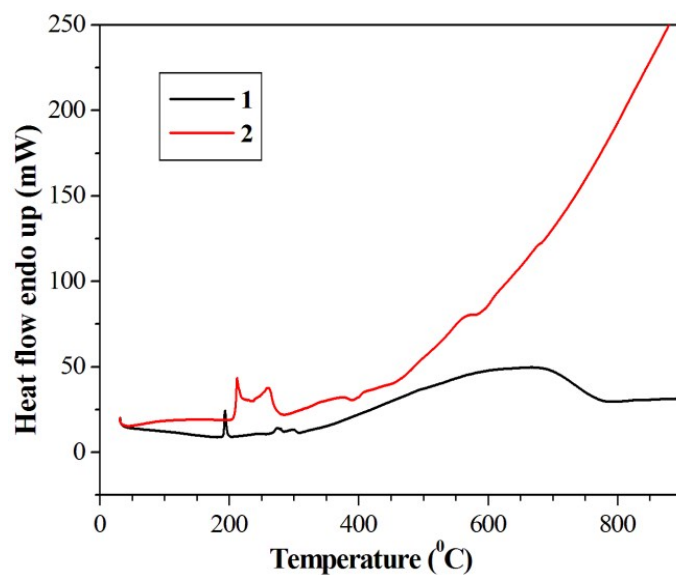

S.Fig. 9. DTA curves showing endothermic/exothermic peaks of complexes 1 and 2

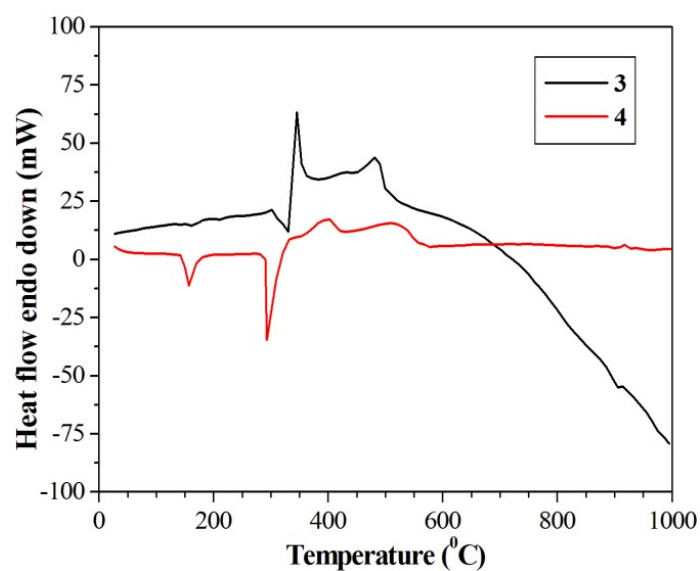

S.Fig. 10. DTA curves showing endothermic/exothermic peaks of complexes 3 and 4

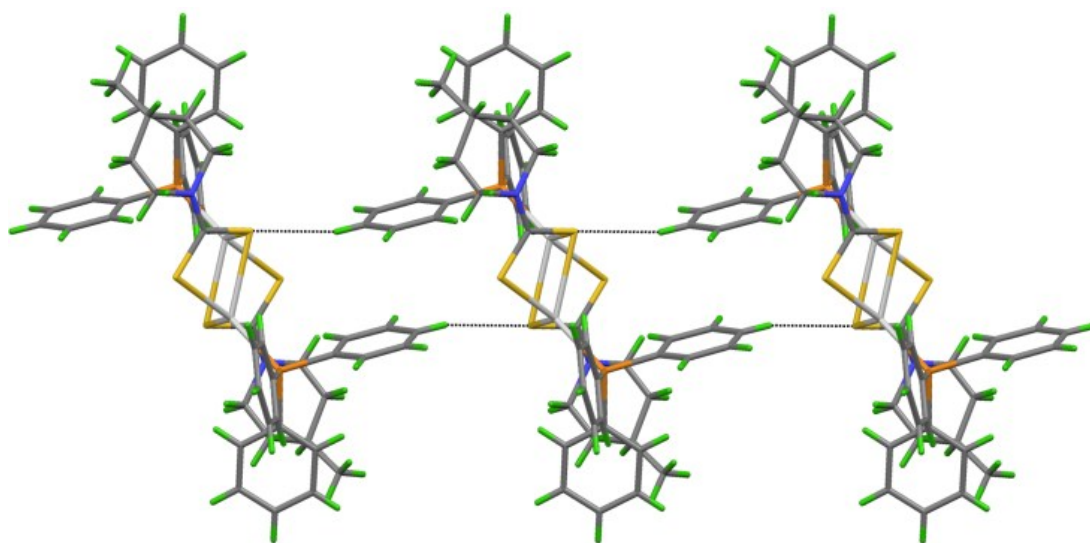

S.Fig. 11. C-H...S interactions between dithio sulfur and C-H hydrogen of the phenyl ring in complex 1

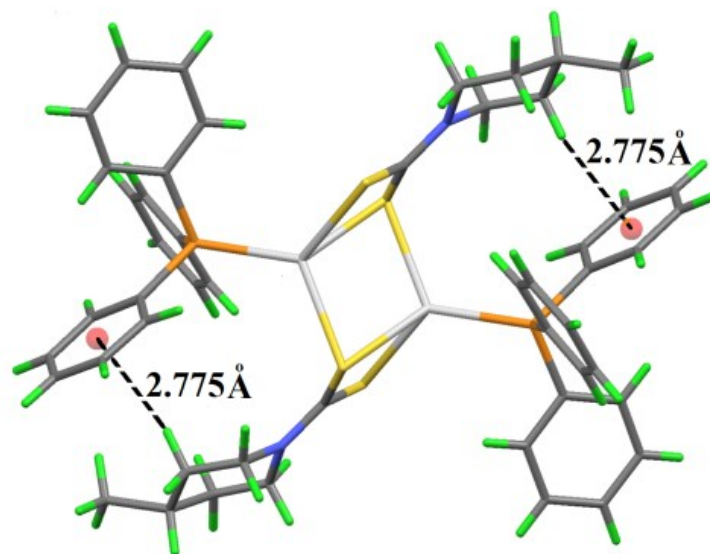

**S.Fig. 12.** C-H $\cdots\pi$  interactions between C-H of piperidine ring and  $\pi$  electrons of a phenyl ring of PPh<sub>3</sub> in complex 1

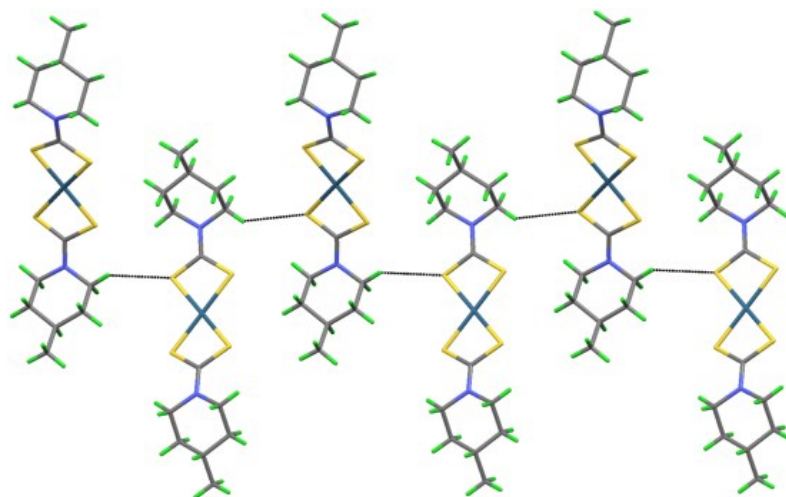

**S.Fig. 13.** C-H $\cdots$ S interactions between the dithio sulfur atom and C-H hydrogen of piperidine ring in complex 2

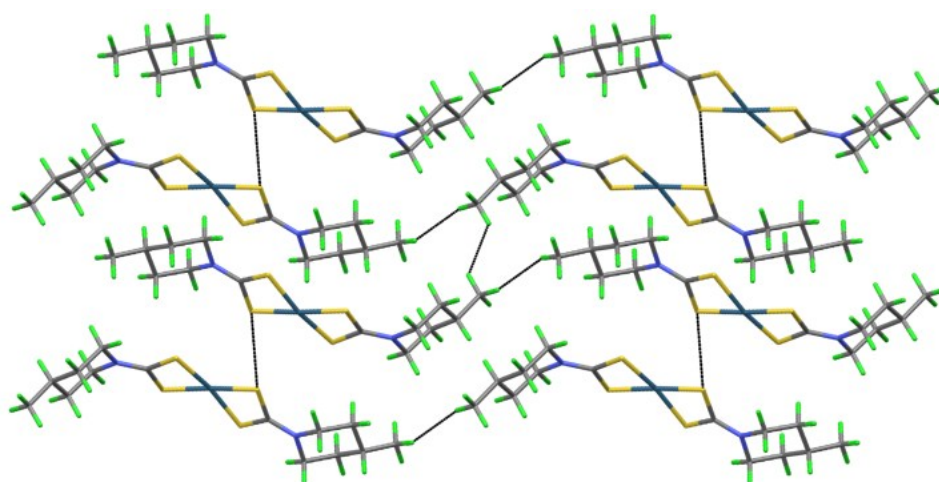

**S.Fig. 14.** S $\cdots$ S interactions in complex 2 leading a wave like architecture

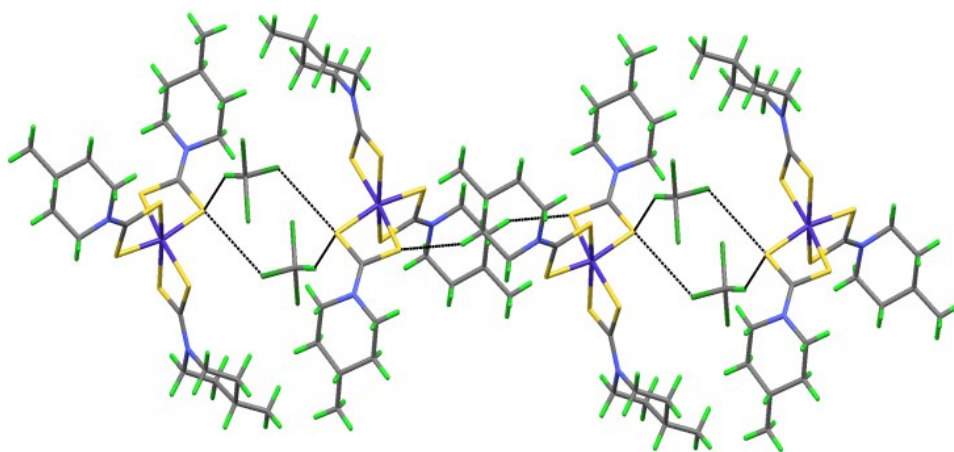

**S.Fig. 15.** C-H...S interactions between dithio sulfur atoms and the hydrogen atoms of the piperidine ring/ hydrogen atoms of chloroform molecules in complex **3**

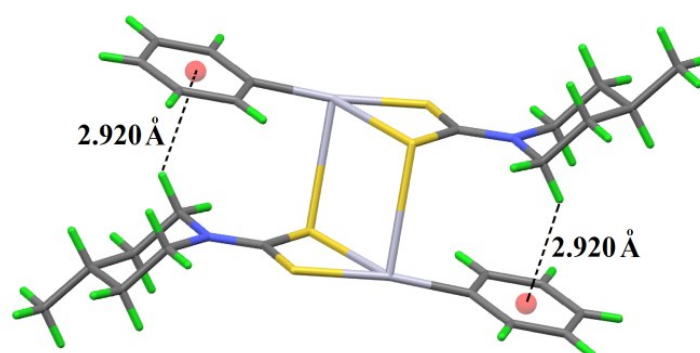

**S.Fig. 16.** C-H... $\pi$  interactions between C-H of piperidine and  $\pi$  electrons of a phenyl rings in complex **4**

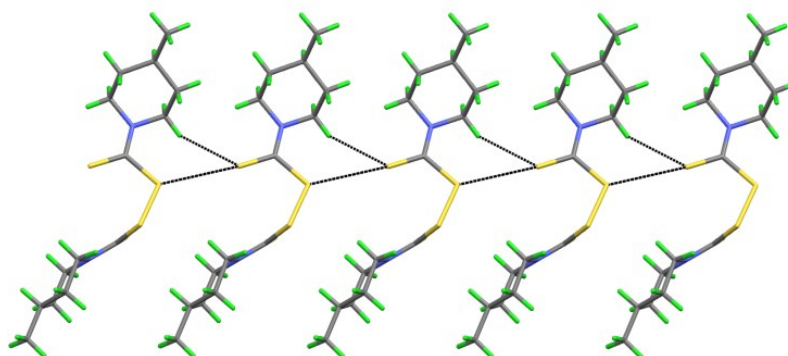

**S.Fig. 17.** C-H...S interaction between thione sulfur and C-H of piperidine ring and S...S interactions in compound **5** leading to a linear chain architecture

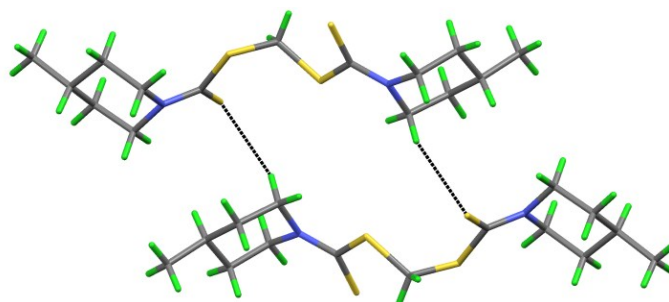

**S.Fig. 18.** C-H...S interaction between hydrogen of piperidine ring and dithiocarbamate sulfur in compound **6**
